# Supplementary material for: Can primary health care mitigate the effects of economic crises on child health in Latin America? An integrated multicountry evaluation and forecasting analysis
Source: PubMed Central journal article supplement (PMC11126366; doi:10.1016/s2214-109x(24)00094-9), 2024-05-16
Supplement: mmc4.pdf [file mmc4.pdf]

# THE LANCET

## Global Health

### Supplementary appendix 4

This Equitable Partnership Declaration (EPD) was submitted by the authors, and we reproduce it as supplied. It has not been peer reviewed. *The Lancet's* editorial processes have not been applied to the EPD.

Supplement to: Moncayo AL, Medeiros Cavalcanti D, Ordoñez JA, et al. Can primary health care mitigate the effects of economic crises on child health in Latin America? An integrated multicountry evaluation and forecasting analysis. *Lancet Glob Health* 2024; **12**: e938–46.

## **Equitable Partnership Declaration questions**

This Equitable Partnership Declaration is a statement being published online alongside papers at *The Lancet Global Health*, as a separate appendix, to allow researchers to describe how their work engages with researchers, communities, and environments in the countries of study. This is part of our broader goal to decolonise global health, handing control and leadership of research to academics and clinicians who are based in the regions of study, and to affected communities.

Please answer all questions with as much detail as possible, noting that all included information will be published open-access and it will be freely available online to all who wish to read it. If a question does not apply to your study, please state “Not applicable”.

The format of and questions in this statement are currently in a pilot phase. Please email Dr Liam Messin ([Liam.Messin@lancet.com](mailto:Liam.Messin@lancet.com); deputy editor) and Dr Kate McIntosh ([Kate.McIntosh@lancet.com](mailto:Kate.McIntosh@lancet.com); senior editor) with any feedback, particularly if you find any questions unclear.

### **Researcher considerations**

1. Please detail the involvement that researchers who are based in the region(s) of study had during a) study design; b) clinical study processes, such as processing blood samples, prescribing medication, or patient recruitment; c) data interpretation; and d) manuscript preparation, commenting on all aspects. If they were not involved in any of these aspects, please explain why.

*This question is intended for international partnerships; if all your authors are based in the area of study, this question is not applicable.*

*This should include a thorough description of their leadership role(s) in the study. Are local researchers named in the author list or the acknowledgements, or are they not mentioned at all (and, if not, why)? Please also describe the involvement of early career researchers based in the location of the study. Some of this information might be repeated from the Contributors section in the manuscript. Note: we adhere to [ICMJE authorship criteria](#) when deciding who should be named on a paper.*

|                                                                                                                                                                                                  |
|--------------------------------------------------------------------------------------------------------------------------------------------------------------------------------------------------|
| <b>a) Study design:</b> Davide Rasella, Ana L. Moncayo, Philip Hessel and Carlos Chivardi                                                                                                        |
| <b>b) Clinical study processes:</b> Not applicable                                                                                                                                               |
| <b>c) Data interpretation:</b> Davide Rasella, Ana L. Moncayo, Philip Hessel, Carlos Chivardi, Daniela Cavalcanti, José Alejandro Ordoñez.                                                       |
| <b>d) Manuscript preparation:</b> Davide Rasella, Ana L. Moncayo, Daniela Cavalcanti and José Alejandro Ordoñez, Cristina Almeida. Daniela Zuluaga, Juan Felipe Perdomo, Alejandro Zamudio Sosa. |

2. Were the data used in your study collected by authors named on the paper, or have they been extracted from a source such as a national survey? ie, is this a secondary analysis of data that were not collected by the authors of this paper. If the authors of this paper were not involved in data collection, how were data interpreted with sufficient contextual knowledge?

The Lancet Global Health *believe contextual understanding is crucial for informed data analysis and interpretation.*

The study involved the use of secondary data, which were not originally collected by the authors of this paper. However, the majority of the authors are from Colombia, Brazil, Ecuador, and Mexico, including the first authors and corresponding author. The authors from other countries significantly contributed to the interpretation of the results due to their extensive experience in conducting studies on the impact of policies on health in Brazil and Colombia. Their in-depth knowledge and background allowed them to provide valuable insights and context to enhance the understanding of the study's outcomes.

3. How was funding used to remunerate and enhance the skills of researchers and institutions based in the area(s) of study? And how was funding used to improve research infrastructure in the area of study?

*Potentially effective investments into long-term skills and opportunities within institutions could include training or mentorship in analytical techniques and manuscript writing, opportunities to lead all or specific aspects of the study, financial remuneration rather than requiring volunteers, and other professional development and educational opportunities.*

*Improvements to research infrastructure could be funding of extended trial designs (such as platform trials) and use of master protocols to enable these designs, establishment of long-term contracts for research staff, building research facilities, and local control of funding allocation.*

**Skills:**

Training in techniques for impact evaluations  
Mentorship in analytical techniques and manuscript writing  
Opportunities to lead a specific study  
Sponsorship for Conference Paper Presentations  
Financial remunerations

**Research infrastructure:**

Local control of funding allocation

4. How did you safeguard the researchers who implemented the study?

*Please describe how you guaranteed safe working conditions for study staff, including provision of appropriate personal protective equipment, protection from violence, and prevention of overworking.*

We ensured the well-being of the researchers who conducted the study by strictly adhering to all guidelines, regulations and ethical codes against violence and overworking of each institution involved in the study.

*Benefits to the communities and regions of study*

5. How does the study address the research and policy priorities of its location?

*How were the local priorities determined and then used to inform the research question? Who decided which priorities to take forward? Which elements of the study address those priorities?*

The identification of local priorities was a collaborative effort involving key stakeholders, and policymakers. By engaging in this dialogue, we were able to prioritize the most significant issues that required attention and align them with the objectives of the study.

6. How will research products be shared in the community of study?

*For instance, will you be providing written or oral layperson summaries for non-academic information sharing? Will study data be made available to institutions in the region(s) of study? The Lancet Global Health encourages authors to translate the summary (abstract) into relevant languages after paper editing; do you intend to translate your summary?*

All data used in the study come from publicly available sources in each country. The study results will be shared with the general community through print media, radio, or television, as well as through digital platforms. In addition, the summary of the paper will be translated in Spanish and Portuguese.

7. How were individuals, communities, and environments protected from harm?

- a) *How did you ensure that sensitive patient data was handled safely and respectfully? Was there any potential for stigma or discrimination against participants arising from any of the procedures or outcomes of the study?*

*Not applicable*

b) *Might any of the tests be experienced as invasive or culturally insensitive?*

*Not applicable*

c) *How did you determine that work was sensitive to traditions, restrictions, and considerations of all cultural and religious groups in the study population?*

*Not applicable*

d) *Were biowaste and radioactive waste disposed of in accordance with local laws?*

*Not applicable*

e) *Were any structures built that would have impacted members of the community or the environment (such as handwashing facilities in a public space)? If so, how did you ensure that you had appropriate community buy-in?*

*Not applicable*

f) *How might the study have impacted existing health-care resources (such as staff workloads, use of equipment that is typically employed elsewhere, or reallocation of public funds)?*

*Not applicable*

8. Finally, please provide the title (eg, Dr/Prof, Mr/Mrs/Ms/Mx), name, and email address of an author who can be contacted about this statement. This can be the corresponding author.

**Name:** PhD. Ana L. Moncayo

**Email:** amoncayo708@puce.edu.ec
